# Supplementary material
Source: Elsevier journal article supplement (https://www.sciencedirect.com/science/article/pii/S0213911119301499)
Supplement: mmc1 [file S0213911119301499:mmc1.docx]

**Appendix. Supplementary data**

Supplementary data associated with this article can be found, in the online version, at htt://[dx.doi.org/10.1016....](http://dx.doi.org/10.1016....)..

**What is known about the topic?**

Dislocation of the hip is a common but often preventable complication in children with cerebral palsy. Surveillance programs for early detection have been shown to be effective and practical, but no previous study has provided evidence on the cost-effectiveness of this intervention.

**What does this study add to the literature?**

We provide the first cost-effectiveness evaluation of a surveillance program to prevent hip dislocation in children with cerebral palsy. Our study indicates that these programs are likely to be cost-effective. This information aims to support decision making in the Spanish National Health Service, but these results might be of relevance in other settings.

**Editor in charge**

Miguel Ángel Negrín Hernández.

**Transparency declaration**

The corresponding author on behalf of the other authors guarantee the accuracy, transparency and honesty of the data and information contained in the study, that no relevant information has been omitted and that all discrepancies between authors have been adequately resolved and described.

**Authorship contributions**

L. Vallejo-Torres, A. Rivero-Santana and L. Perestelo-Pérez conceived the study, and P. Serrano-Aguilar oversaw its conduct. A. Rivero-Santana, L. Perestelo-Pérez and P. Serrano-Aguilar conducted the systematic review of effectiveness. C. Martin-Saborido, C.L. Castellano-Fuentes and A. Escobar-Martínez contributed to the design of the model and to the data collection of the parameters required to populate the cost-effectiveness model, including epidemiological data, resource use, unit costs and utilities. L. Vallejo-Torres, A. Rivero-Santana and D. Epstein led the model design, analyzed the data and interpreted the results. L. Vallejo-Torres drafted the manuscript, and all authors edited and revised the manuscript, and approved the final manuscript.

**Acknowledgements**

The authors would like to thank Carlos González Rodríguez for his support in the literature review.

**Funding**

This work was undertaken in the framework of activities run by the Network of Health Technology Assessment Agencies, funded by the Ministry of Health, Social Services and Equality in Spain.

**Conflicts of interest**

None.
